# Supplementary material
Source: MDPI journal article supplement (https://www.mdpi.com/2079-9276/7/4/61)
Supplement: s1 [file s1]

## Supplementary Materials

**Table S1:** Studies focusing on the potential of tourism and eco-tourism in Bangladesh.

| No   | Author                        | Title                                                                                                                                        |
|------|-------------------------------|----------------------------------------------------------------------------------------------------------------------------------------------|
| [1]  | Salam et al., 2000            | Eco-tourism to protect the reserve mangrove forest the Sundarbans and its flora and fauna.                                                   |
| [2]  | Moinuddin and Begum, 2004     | eco-tourism: An investigation into the conceptual framework and policy requirements for its growth in Bangladesh.                            |
| [3]  | Khanam and Khan, 2005         | Necessity of private sector involvement in the development of eco-tourism: the case of Bangladesh.                                           |
| [4]  | Jakir, 2006                   | The Use of Promotional Activities in the Tourism Industry: The Case of Bangladesh.                                                           |
| [5]  | Hossain and Islam, 2006       | Status of the biodiversity of St. Martin's Island, Bay of Bengal, Bangladesh.                                                                |
| [6]  | Shamsuddoha et al., 2008      | Expansion of tourism sector in Bangladesh.                                                                                                   |
| [7]  | Shamsuddoha and Nedelea, 2008 | Exploring Tourist Spots for Promoting Investments in Tourism Industry of Bangladesh.                                                         |
| [8]  | Islam, 2009                   | Tourism Marketing in developing Countries- A study of Bangladesh.                                                                            |
| [9]  | Iqball et al., 2010           | Ecotourism in the Sundarbans and its surrounding—a possible sustainable option for alternative livelihood development.                       |
| [10] | Rahman, 2010                  | Application of GIS in ecotourism development: a case study in Sundarbans, Bangladesh.                                                        |
| [11] | Rahman, 2010                  | Exploring the socio-economic impacts of tourism: a study of Cox's Bazar, Bangladesh.                                                         |
| [12] | Chowdhury, 2010               | Preliminary survey of shorebird hunting in five villages around Sonadia Island, Cox's Bazar, Bangladesh.                                     |
| [13] | Saiful et al., 2011           | Community based ecotourism in The Sundarbans of Bangladesh.                                                                                  |
| [14] | Tuhin and Majumder, 2011      | An Appraisal of Tourism Industry Development in Bangladesh.                                                                                  |
| [15] | Hasan, 2012                   | Package eco-tour as special interest tourism product-Bangladesh perspective.                                                                 |
| [16] | Chowdhury and Shahrar, 2012   | The Impact of Tourism in a Deficit Economy: A Conceptual Model in Bangladesh.                                                                |
| [17] | Afroz and Hasanuzzaman, 2012  | Problems and Prospects of Tourism in Bangladesh Bandarban District Case.                                                                     |
| [18] | Islam, 2013                   | Can community-based tourism facilitate conservation of the Bangladesh Sundarbans?                                                            |
| [19] | Chowdhury et al., 2013        | Promoting public private partnership for development of tourism sector of Bangladesh: an exploratory study.                                  |
| [20] | Chowdhury, 2013               | Chittagong-A hub of eco-tourism.                                                                                                             |
| [21] | Hassan et al., 2013           | Impact of Tourism in Bangladesh Economy.                                                                                                     |
| [22] | Gulam et al., 2013            | Environmental effects of tourism.                                                                                                            |
| [23] | Hasan and Mondal, 2013        | Factor affecting to choose Cox's bazar sea beach of Bangladesh as a tourist destination.                                                     |
| [24] | Ishtiaque, 2013               | Tourism Vision 2020: A Case of Bangladesh Tourism with Special Emphasis on International Tourist Arrivals and Tourism Receipts.              |
| [25] | Rahman et al., 2013           | Ecotourism and protected area conservation in Bangladesh: A case study on understanding the visitor's views on prospects and development.    |
| [26] | Fahim and Dooty, 2014         | Islamic Tourism: In the Perspective of Bangladesh.                                                                                           |
| [27] | Sarkar, 2014                  | Competitive marketing strategies for tourism industry in the light of "Vision 2021" of Bangladesh.                                           |
| [28] | Ullah and Hafiz, 2014         | Finding suitable locations for ecotourism development in Cox's Bazar using geographical information system and analytical hierarchy process. |

- [29] Wakil, 2014 Role of tourism to achieve environmental sustainability in coastal areas: a case of Cox's Bazar, Bangladesh.
- [30] Saha et al., 2015 Community based ecotourism in income generation: a study on the Sundarbans adjacent area of Bangladesh.
- [31] Islam, 2015 Study on factors influencing tourism: Way forward for sustainable tourism in Bangladesh.
- [32] Muzib and Banarjee, 2015 Tourism and Crime: The Case of Bangladesh.
- [33] Al-Masud, 2015 Tourism Marketing in Bangladesh: What, Why and How.
- [34] Alam et al., 2015 Application of Environmental Ethics for Sustainable Development and Conservation of Saint Martin's Island in Bangladesh.
- [35] Ahmed et al., 2015 Riverine Tourism: Untapped Treasure of Bangladesh.
- [36] Rahman et al., 2015 Status of "Kuakata" a neglected natural scenic resource of Bangladesh.
- [37] Dey et al., 2015 Tourists' perception towards Cox's Bazar sea beach in Bangladesh as a tourist destination.
- [38] Arif and Islam, 2016 Opportunities of Tourism Sector in Bangladesh
- [39] Ahammed et al., 2016 A study of environmental impacts on the coral resources in the vicinity of the Saint Martin Island, Bangladesh.
- [40] Islam and Carlsen, 2016 Indigenous communities, tourism development and extreme poverty alleviation in rural Bangladesh.
- [41] Ahmed, 2016 Sustainable tourism development in Bangladesh.
- [42] Kenny, 2017 The Road Less Travelled: A Case Study on Ecotourism and Sustainable Development in the Sundarbans, Bangladesh.
- [43] Rahman et al., 2017 Activity budgets and dietary investigations of *Varanus salvator* (Reptilia: Varanidae) in Karamjal ecotourism spot of Bangladesh Sundarbans mangrove forest.
- [44] Fakir and Ahmed, 2017 The Opportunities of Career Development in Tourism Industry in Bangladesh.
- [45] Redwan, 2017 Attempts to identify and analyse prospects and challenges of tourism marketing in Bangladesh.
- [46] Islam et al., 2017 Determining Drivers of Destination Attractiveness: The Case of Nature-Based Tourism of Bangladesh.
- [47] Zhanq et al., 2017 Tourist adaptation behavior in response to climate disasters in Bangladesh.
- [48] Mondal, 2017 Swot Analysis and Strategies To Develop Sustainable Tourism In Bangladesh.
- [49] Hai and Alamgir, 2017 Local Community Attitude and Support Towards Tourism Development at Saint Martin Island, Bangladesh: Local Community Attitude and Support.
-
